# Supplementary material for: Brief communication: How deep is the snow on Mount Everest?
Source: Copernicus journal article supplement (doi:10.5194/tc-17-2625-2023), 2023-07-06
Supplement: Supplementary file 1 [file tc-17-2625-2023-supplement.pdf]

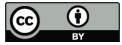

*Supplement of*

## **Brief communication: How deep is the snow on Mount Everest?**

**Wei Yang et al.**

*Correspondence to:* Huabiao Zhao (zhaohb@itpcas.ac.cn)

The copyright of individual parts of the supplement might differ from the article licence.

Table S1. The approximately antenna locations recorded by a portable global navigation satellite system on May 4<sup>th</sup>, 2022.

| Norther slope |                    |                   | Summit area  |                    |                   |
|---------------|--------------------|-------------------|--------------|--------------------|-------------------|
| Trace number  | Longitude (Degree) | Latitude (Degree) | Trace number | Longitude (Degree) | Latitude (Degree) |
| 1             | 86.925182          | 27.98822          | 32           | 86.925168          | 27.9881           |
| 2             | 86.925182          | 27.988209         | 33           | 86.925169          | 27.9881           |
| 3             | 86.925182          | 27.988198         | 34           | 86.925169          | 27.9881           |
| 4             | 86.925178          | 27.988191         | 35           | 86.925169          | 27.9881           |
| 5             | 86.92518           | 27.988192         | 36           | 86.92517           | 27.988099         |
| 6             | 86.925181          | 27.988186         | 37           | 86.92517           | 27.988099         |
| 7             | 86.925183          | 27.98818          | 38           | 86.925171          | 27.988098         |
| 8             | 86.925187          | 27.988177         | 39           | 86.925173          | 27.988097         |
| 9             | 86.925178          | 27.988169         | 40           | 86.925174          | 27.988096         |
| 10            | 86.92517           | 27.988155         | 41           | 86.925175          | 27.988095         |
| 11            | 86.925172          | 27.988151         | 42           | 86.925175          | 27.988095         |
| 12            | 86.925172          | 27.988149         | 43           | 86.925177          | 27.988093         |
| 13            | 86.925173          | 27.988145         | 44           | 86.925177          | 27.988093         |
| 14            | 86.925173          | 27.988142         | 45           | 86.925183          | 27.988089         |
| 15            | 86.925173          | 27.988138         | 46           | 86.925183          | 27.988089         |
| 16            | 86.925173          | 27.988133         | 47           | 86.925183          | 27.988087         |
| 17            | 86.925175          | 27.98813          | 48           | 86.925183          | 27.988087         |
| 18            | 86.925178          | 27.988125         | 49           | 86.925182          | 27.988095         |
| 19            | 86.92518           | 27.98812          | 50           | 86.925182          | 27.988095         |
| 20            | 86.925182          | 27.988115         | 51           | 86.925182          | 27.988096         |
| 21            | 86.925183          | 27.988115         | 52           | 86.925182          | 27.988096         |
| 22            | 86.925183          | 27.988111         | 53           | 86.925178          | 27.988095         |
| 23            | 86.925181          | 27.988108         | 54           | 86.925178          | 27.988094         |
| 24            | 86.925178          | 27.988105         | 55           | 86.925172          | 27.988098         |
| 25            | 86.925183          | 27.988103         | 56           | 86.925173          | 27.988097         |
| 26            | 86.925171          | 27.988102         | 57           | 86.925174          | 27.988096         |
| 27            | 86.925175          | 27.988101         |              |                    |                   |
| 28            | 86.925177          | 27.988104         |              |                    |                   |
| 29            | 86.925172          | 27.988103         |              |                    |                   |
| 30            | 86.925169          | 27.988102         |              |                    |                   |
| 31            | 86.925178          | 27.988098         |              |                    |                   |
